# Supplementary material for: Exploiting bounded signal flow for graph orientation based on cause–effect pairs
Source: Springer Nature journal article supplement (doi:10.1186/1748-7188-6-21), 2011-08-25

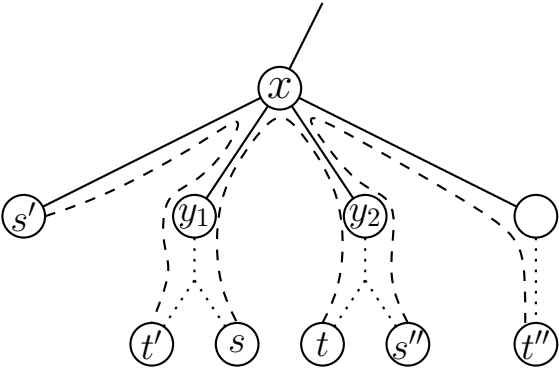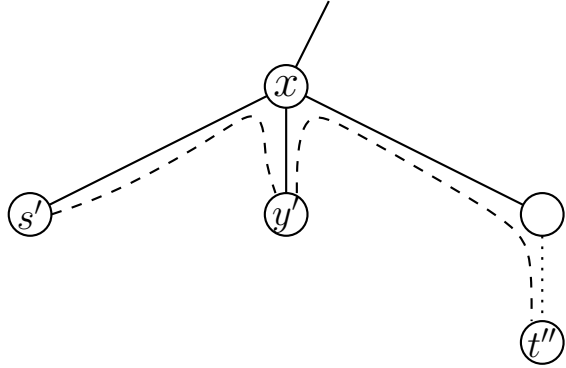

Supplement: 13015_2011_134_MOESM1_ESM.pdf [file 13015_2011_134_MOESM1_ESM.pdf]
